# Supplementary material
Source: HighWire-hosted journal article supplement (https://diabetes.diabetesjournals.org/content/suppl/2005/02/28/54.3.880)
Supplement: Pg880Table1.pdf [file Pg880Table1.pdf]

# Supplementary Table 1

## Expression of gene sequences increased or decreased by 2 folds or more

| Accession number |                                                                                                                                      | Symbol   | Fold change | P value      |
|------------------|--------------------------------------------------------------------------------------------------------------------------------------|----------|-------------|--------------|
| AA630320         | methylene tetrahydrofolate dehydrogenase (NAD+ dependent), methylenetetrahydrofolate cyclohydrolase                                  | MTHFD2   | 22.62       | <b>0.048</b> |
| T60117           | spectrin, alpha, non-erythrocytic 1 (alpha-fodrin)                                                                                   | SPTAN1   | 12.73       | <b>0.042</b> |
| AI311734         | fatty acid binding protein 6, ileal (gastrotropin)                                                                                   | FABP6    | 5.17        | <b>0.033</b> |
| AA291486         | PTK2 protein tyrosine kinase 2                                                                                                       | PTK2     | 4.73        | <b>0.010</b> |
| AW029010         | nuclear protein                                                                                                                      | NP220    | 4.71        | <b>0.008</b> |
| N92519           | E2F transcription factor 3                                                                                                           | E2F3     | 4.33        | <b>0.019</b> |
| AA410435         | alpha thalassemia/mental retardation syndrome X-linked (RAD54 homolog, <i>S. cerevisiae</i> )                                        | ATR      | 3.96        | <b>0.025</b> |
| AA704492         | transducin-like enhancer of split 4 (E(sp1) homolog, <i>Drosophila</i> )                                                             | TLE4     | 3.71        | <b>0.031</b> |
| N63845           | phytanoyl-CoA hydroxylase (Refsum disease)                                                                                           | PHYH     | 3.47        | <b>0.004</b> |
| AA447748         | dihydrolipoamide dehydrogenase (E3 component of pyruvate dehydrogenase complex, 2-oxo-glutarate complex, branched chain keto acid)   | DLD      | 3.42        | <b>0.012</b> |
| AA521350         | 15 kDa selenoprotein                                                                                                                 |          | 15-Sep      | 3.31         |
| AA425302         | MAGEF1 protein                                                                                                                       | MAGEF1   | 3.31        | <b>0.003</b> |
| R09069           | glucan (1,4-alpha)-, branching enzyme 1 (glycogen branching enzyme, Andersen disease, glycogen storage disease type IV)              | GBE1     | 3.23        | <b>0.009</b> |
| AA410636         | isoleucine-tRNA synthetase                                                                                                           | IARS     | 3.21        | <b>0.025</b> |
| AA459683         | peroxiredoxin 4                                                                                                                      | PRDX4    | 3.17        | <b>0.005</b> |
| R52654           | cytochrome c                                                                                                                         | HCS      | 3.10        | <b>0.032</b> |
| N81076           | far upstream element (FUSE) binding protein 3                                                                                        | FUBP3    | 3.07        | <b>0.037</b> |
| AA448194         | survival of motor neuron 2, centromeric                                                                                              | SMN2     | 3.07        | <b>0.040</b> |
| N93053           | NADH dehydrogenase (ubiquinone) 1 beta subcomplex, 5 (16kD, SGDH)                                                                    | NDUFB5   | 3.06        | <b>0.032</b> |
| N94428           | E1A binding protein p300                                                                                                             | EP300    | 2.99        | <b>0.011</b> |
| AA447632         | glivoprotein M6A                                                                                                                     | GPMP6A   | 2.94        | <b>0.035</b> |
| AA099534         | activated RNA polymerase II transcription cofactor 4                                                                                 | PC4      | 2.91        | <b>0.017</b> |
| AA029419         | envoplakin                                                                                                                           | EVPL     | 2.80        | <b>0.021</b> |
| AA504852         | small membrane protein 1                                                                                                             | SMP1     | 2.77        | <b>0.024</b> |
| H18070           | mitochondrial translational initiation factor 2                                                                                      | MTIF2    | 2.76        | <b>0.038</b> |
| N74956           | polymerase (RNA) II (DNA directed) polypeptide B (140kD)                                                                             | POLR2B   | 2.74        | <b>0.032</b> |
| R54807           | sarcoglycan, beta (43kD dystrophin-associated glycoprotein)                                                                          | SGCB     | 2.70        | <b>0.046</b> |
| H65676           | suppression of tumorigenicity 13 (colon carcinoma) (Hsp70 interacting protein)                                                       | ST13     | 2.70        | <b>0.018</b> |
| H85464           | Deleted in split-hand/split-foot 1 region                                                                                            | DSS1     | 2.68        | <b>0.017</b> |
| AA402875         | U6 snRNA-associated Sm-like protein LSm7                                                                                             | LCS31690 | 2.66        | <b>0.041</b> |
| AI671926         | tumor protein, translationally-v-controlled 1                                                                                        | TPP1     | 2.63        | <b>0.036</b> |
| H28710           | endothelin receptor type B                                                                                                           | EDNRB    | 2.62        | <b>0.043</b> |
| AA453776         | alcohol dehydrogenase 5 (class III), chi polypeptide                                                                                 | ADH5     | 2.61        | <b>0.023</b> |
| AA043347         | a disintegrin and metalloproteinase domain 10                                                                                        | ADAM10   | 2.57        | <b>0.003</b> |
| W70234           | dipeptidylpeptidase IV (CD26, adenosine deaminase complexing protein 2)                                                              | DPP4     | 2.54        | <b>0.047</b> |
| N47099           | MAD, mothers against decapentaplegic homolog 2 ( <i>Drosophila</i> )                                                                 | MADH2    | 2.53        | <b>0.029</b> |
| AA449753         | capping protein (actin filament) muscle Z-line, alpha 1                                                                              | CAPZA1   | 2.50        | <b>0.019</b> |
| T81103           | Sp2 transcription factor                                                                                                             | SP2      | 2.49        | <b>0.034</b> |
| R59927           | paired basic amino acid cleaving enzyme (lurin, membrane associated receptor protein)                                                | PACE     | 2.49        | <b>0.021</b> |
| W96107           | Sec61 gamma                                                                                                                          | SEC61G   | 2.48        | <b>0.012</b> |
| H50229           | pyrophosphatase (inorganic)                                                                                                          | PP       | 2.48        | <b>0.038</b> |
| AA045731         | TGFB inducible early growth response                                                                                                 | TIEG     | 2.46        | <b>0.036</b> |
| AA621315         | catenin (cadherin-associated protein), alpha-like 1                                                                                  | CTNNAL1  | 2.46        | <b>0.030</b> |
| AA235388         | tropomodulin                                                                                                                         | TMOD     | 2.45        | <b>0.042</b> |
| AI824256         | sine oculis homeobox homolog 1 ( <i>Drosophila</i> )                                                                                 | SIX1     | 2.45        | <b>0.030</b> |
| AI968209         | ash2 (absent, small, or homeotic)-like ( <i>Drosophila</i> )                                                                         | ASH2L    | 2.41        | <b>0.034</b> |
| W95964           | PHD finger protein 3                                                                                                                 | PHF3     | 2.41        | <b>0.046</b> |
| R55251           | GCN1 general control of amino-acid synthesis 1-like 1 (yeast)                                                                        | GCN1L1   | 2.40        | <b>0.029</b> |
| AA459263         | BCL2-related protein A1                                                                                                              | BCL2A1   | 2.39        | <b>0.008</b> |
| AA708298         | ATP synthase, H+ transporting, mitochondrial F1 complex, beta polypeptide                                                            | ATP5B    | 2.37        | <b>0.043</b> |
| AA284492         | tetraspan 3                                                                                                                          | TSPAN3   | 2.34        | <b>0.018</b> |
| AA448277         | forkhead box O1A (rhabdomyosarcoma)                                                                                                  | FOXO1A   | 2.32        | <b>0.004</b> |
| AA935263         | glutamate receptor, ionotropic, AMPA 3                                                                                               | GRIA3    | 2.32        | <b>0.017</b> |
| AA432085         | tyrosine 3-monooxygenase/tryptophan 5-monooxygenase activation protein, gamma polypeptide                                            | YWHA3    | 2.32        | <b>0.008</b> |
| W02101           | heterogeneous nuclear ribonucleoprotein A2/B1                                                                                        | HRP2B1   | 2.31        | <b>0.009</b> |
| W15574           | N/A                                                                                                                                  | N/A      | 2.31        | <b>0.033</b> |
| AA430744         | N/A                                                                                                                                  | N/A      | 2.30        | <b>0.003</b> |
| AA043501         | v-maf musculoaponeurotic fibrosarcoma oncogene homolog (avian)                                                                       | MAF      | 2.30        | <b>0.026</b> |
| N59626           | protein disulfide isomerase related protein (calcium-binding protein, intestinal-related)                                            | ERP70    | 2.29        | <b>0.018</b> |
| AA045793         | DnaJ (Hsp40) homolog, subfamily B, member 9                                                                                          | DNAJB9   | 2.29        | <b>0.014</b> |
| AA012822         | oxysterol binding protein                                                                                                            | OSBP     | 2.28        | <b>0.047</b> |
| AA490920         | MHC class II transactivator                                                                                                          | MMCH2A   | 2.28        | <b>0.033</b> |
| AA459868         | ESTs, Moderately similar to UBCE5 HUMAN UBIQUITIN-CONJUGATING ENZYME E2-21 KD UBCH6 [H.sapiens]                                      | N/A      | 2.27        | <b>0.018</b> |
| AA076063         | Homo sapiens, clone IMAGE4298901, mRNA                                                                                               | N/A      | 2.26        | <b>0.046</b> |
| N70794           | acyl-Coenzyme A dehydrogenase, C-4 to C-12 straight chain                                                                            | ACADM    | 2.24        | <b>0.011</b> |
| R71328           | ESTs, Highly similar to GCHUH glycine cleavage system protein H precursor [H.sapiens]                                                | N/A      | 2.23        | <b>0.037</b> |
| AA456028         | Rab geranylgeranyltransferase, beta subunit                                                                                          | RABGGTB  | 2.23        | <b>0.013</b> |
| AA133212         | nuclear receptor coactivator 4                                                                                                       | NCOA4    | 2.22        | <b>0.020</b> |
| AI493402         | TATA box binding protein (TBP)-associated factor, RNA polymerase I, A, 48kD                                                          | TAF1A    | 2.21        | <b>0.019</b> |
| N89861           | mitochondrial ribosomal protein L42                                                                                                  | MRPL42   | 2.21        | <b>0.025</b> |
| AA504465         | ATP synthase, H+ transporting, mitochondrial F0 complex, subunit F6                                                                  | ATP5F6   | 2.21        | <b>0.023</b> |
| H73353           | Fc fragment of IgE, high affinity I, receptor for, gamma polypeptide                                                                 | FCER1G   | 2.20        | <b>0.036</b> |
| H73914           | LIM domain binding 2                                                                                                                 | LDB2     | 2.20        | <b>0.047</b> |
| AA256508         | spinocerebellar ataxia 1 (olivopontocerebellar ataxia 1, autosomal dominant, ataxin 1)                                               | SCA1     | 2.19        | <b>0.004</b> |
| AA504521         | tousled-like kinase 1                                                                                                                | TLK1     | 2.19        | <b>0.039</b> |
| AA18821          | nuclear autoantigen                                                                                                                  | GS2NA    | 2.17        | <b>0.016</b> |
| AA046067         | UDP-glucose pyrophosphorylase 2                                                                                                      | UGP2     | 2.17        | <b>0.039</b> |
| AA453765         | ATP synthase, H+ transporting, mitochondrial F0 complex, subunit b, isoform 1                                                        | ATP5F1   | 2.16        | <b>0.045</b> |
| H24650           | laminin, gamma 1 (formerly LAMB2)                                                                                                    | LAMC1    | 2.16        | <b>0.036</b> |
| AI279977         | LIM homeobox protein 6                                                                                                               | LHX6     | 2.14        | <b>0.010</b> |
| N20335           | clathrin, light polypeptide (Lcb)                                                                                                    | CLTB     | 2.13        | <b>0.018</b> |
| AW004895         | ESTs, Highly similar to CH60_HUMAN 60 KDA HEAT SHOCK PROTEIN, MITOCHONDRIAL PRECURSOR [H.sapiens]                                    | N/A      | 2.12        | <b>0.047</b> |
| H73714           | replication factor C (activator 1) 1 (145kD)                                                                                         | RFC1     | 2.12        | <b>0.017</b> |
| N51280           | ADP-ribosylation factor-like 1                                                                                                       | ARL1     | 2.10        | <b>0.027</b> |
| AA043466         | molybdenum cofactor synthesis 2                                                                                                      | MOCS2    | 2.10        | <b>0.003</b> |
| AA775364         | ESTs, Highly similar to S45004 ribosomal protein L30, cytosolic [H.sapiens]                                                          | N/A      | 2.09        | <b>0.011</b> |
| N54372           | NRAS-related gene                                                                                                                    | DTS155E  | 2.08        | <b>0.018</b> |
| AA019203         | high-mobility group (nonhistone chromosomal) protein 2                                                                               | HMG2     | 2.08        | <b>0.038</b> |
| AI934779         | NADH dehydrogenase (ubiquinone) 1, subcomplex unknown, 2 (14.5kD, B14.5b)                                                            | NDUFC2   | 2.08        | <b>0.027</b> |
| AA284329         | glivoprotein M6B                                                                                                                     | GPMP6B   | 2.07        | <b>0.045</b> |
| AI816969         | extra spindle poles like 1 ( <i>S. cerevisiae</i> )                                                                                  | ESPL1    | 2.07        | <b>0.014</b> |
| AA293365         | mitogen-activated protein kinase kinase 4                                                                                            | MAP2K4   | 2.07        | <b>0.019</b> |
| N72115           | cyclin-dependent kinase inhibitor 2C (p18, inhibits CDK4)                                                                            | CDKN2C   | 2.07        | <b>0.040</b> |
| AI217982         | polycystic kidney disease 2-like 1                                                                                                   | PKD2L1   | 2.06        | <b>0.032</b> |
| AA291749         | estrogen receptor 1                                                                                                                  | ESR1     | 2.05        | <b>0.007</b> |
| AA040703         | profilin 2                                                                                                                           | PFN2     | 2.04        | <b>0.002</b> |
| N94372           | SH3 protein interacting with Nek, 90 kDa                                                                                             | AF3P21   | 2.04        | <b>0.049</b> |
| AA481026         | SWI/SNF related, matrix associated, actin dependent regulator of chromatin, subfamily a, member 2                                    | SMARCA2  | 2.02        | <b>0.019</b> |
| H90431           | adrenergic, beta-2-, receptor, surface                                                                                               | ADRB2    | 2.02        | <b>0.020</b> |
| AI871665         | acetyl-Coenzyme A acetyltransferase 1 (acetoacetyl Coenzyme A thiolase)                                                              | ACAT1    | 2.02        | <b>0.019</b> |
| AI681849         | UDP-N-acetyl-alpha-D-galactosamine:polypeptide N-acetyl-galactosaminyltransferase 7 (GalNAc-T7)                                      | GALNT7   | 2.02        | <b>0.012</b> |
| AA485140         | chromosome 20 open reading frame 6                                                                                                   | C20orf6  | 2.02        | <b>0.032</b> |
| W69211           | small inducible cytokine subfamily A (Cys-Cys), member 11 (eotaxin)                                                                  | SCYA11   | 2.02        | <b>0.027</b> |
| W94629           | Homo sapiens cDNA FLJ11796 fis, clone HEMBA1006158, highly similar to Homo sapiens transcription factor forkhead-like 7 (FKHL7) gene | N/A      | 2.01        | <b>0.006</b> |
| AA424965         | fatty-acid-Coenzyme A ligase, long-chain 3                                                                                           | FACL3    | 2.01        | <b>0.000</b> |
| AA461467         | ornithine decarboxylase 1                                                                                                            | ODC1     | 2.01        | <b>0.028</b> |
| AA598830         | neuroblastoma, suppression of tumorigenicity 1                                                                                       | NBL1     | 0.50        | <b>0.014</b> |
| AA663472         | replication factor C (activator 1) 2 (40kD)                                                                                          | RFC2     | 0.49        | <b>0.039</b> |
| T41177           | N/A                                                                                                                                  | N/A      | 0.46        | <b>0.030</b> |
| AA446108         | endoglin (Osler-Rendu-Weber syndrome 1)                                                                                              | ENG      | 0.46        | <b>0.038</b> |
| AA143331         | matrix metalloproteinase 1 (interstitial collagenase)                                                                                | MMP1     | 0.45        | <b>0.011</b> |
| H94469           | hypothetical protein FLJ12549                                                                                                        | FLJ12549 | 0.40        | <b>0.018</b> |
